# Supplementary material
Source: PubMed Central journal article supplement (PMC2075557)

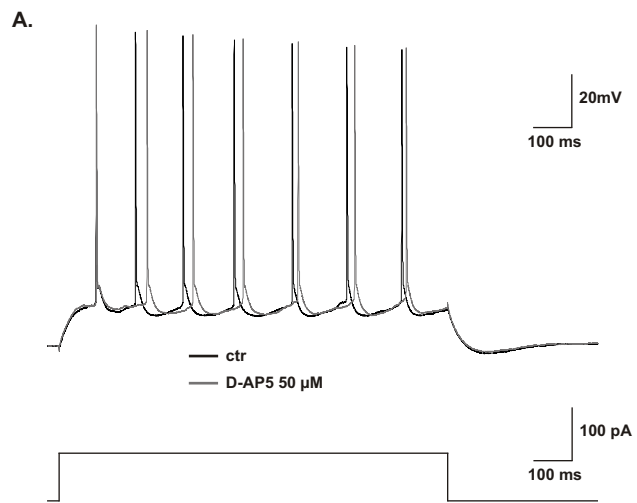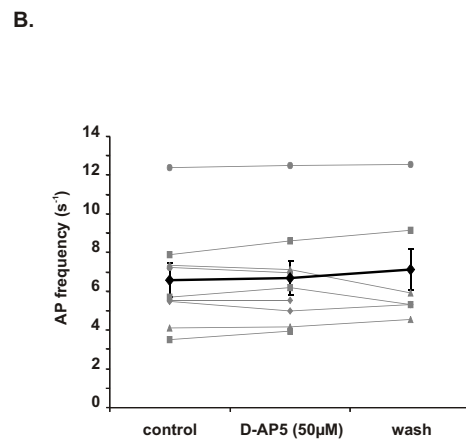

Supplement: jphysiol_2006.123570_1.pdf [file jphysiol_2006.123570_1.pdf]
